# Supplementary material for: Assessment of Mycotoxin Exposure in a Rural County of Chile by Urinary Biomarker Determination
Source: MDPI journal article supplement (doi:10.3390/toxins13070439), 2021-06-25
Supplement: s1 [file s1]

# Supplementary Materials: Assessment of Mycotoxin Exposure in a Rural County of Chile by Urinary Biomarker Determination

Claudia Foerster, Gisela Ríos-Gajardo, Patricia Gómez, Katherine Muñoz, Sandra Cortés, Carlos Maldonado and Catterina Ferreccio

**Table S1.** Odds ratio (OR) and Confidence Intervals (CI) between the selected food items and the presence of mycotoxins in the urine of the  $n = 172$  participants. **Table S1a**, shows the association between food consumption and zearalenone metabolites ( $\alpha$  and  $\beta$  zearalenol, ZEL); **Table S1b**, shows the association between food consumption and deoxynivalenol (DON); and **Table S1c**, shows the association between food consumption and aflatoxin B1 (AFB1) and aflatoxin M1 (AFM1).

**Table S1. a.** Association between food consumption and zearalenone metabolites ( $\alpha$  and  $\beta$  zearalenol, ZEL).

|                      | Food Item                     | <i>p</i> -Value | Coefficient | OR          | 5%    | 95%    | RR    | Total ZEL |     |     |
|----------------------|-------------------------------|-----------------|-------------|-------------|-------|--------|-------|-----------|-----|-----|
|                      |                               |                 |             |             |       |        |       | Food      | Yes | No  |
| Habitual Consumption | Dairy                         | 0.315           | -0.619      | 0.538       | 0.206 | 1.614  | 0.583 | Yes       | 14  | 130 |
|                      |                               |                 |             |             |       |        |       | No        | 4   | 20  |
|                      | Nuts                          | 0.257           | 0.878       | 2.407       | 0.777 | 10.939 | 2.233 | Yes       | 16  | 113 |
|                      |                               |                 |             |             |       |        |       | No        | 2   | 34  |
|                      | Whole cereal                  | 0.623           | 0.262       | 1.300       | 0.518 | 3.057  | 1.261 | Yes       | 6   | 40  |
|                      |                               |                 |             |             |       |        |       | No        | 12  | 104 |
|                      | Capsicum powder               | 0.391           | -0.566      | 0.568       | 0.167 | 1.543  | 0.600 | Yes       | 3   | 37  |
|                      |                               |                 |             |             |       |        |       | No        | 15  | 105 |
|                      | Legumes                       | 0.991           | 16.102      | 9842450.491 | 0.000 | NA     | Inf   | Yes       | 19  | 141 |
|                      |                               |                 |             |             |       |        |       | No        | 0   | 12  |
|                      | Fresh green chili             | 0.635           | -0.262      | 0.770       | 0.291 | 1.832  | 0.793 | Yes       | 5   | 45  |
|                      |                               |                 |             |             |       |        |       | No        | 14  | 97  |
|                      | Fresh red chili               | 0.952           | -0.036      | 0.964       | 0.328 | 2.455  | 0.968 | Yes       | 4   | 32  |
|                      |                               |                 |             |             |       |        |       | No        | 14  | 108 |
|                      | Maize                         | 0.014           | -2.853      | 0.058       | 0.008 | 0.406  | 0.109 | Yes       | 3   | 52  |
|                      |                               |                 |             |             |       |        |       | No        | 2   | 2   |
|                      | Beer                          | 0.195           | -0.852      | 0.427       | 0.126 | 1.153  | 0.463 | Yes       | 3   | 45  |
|                      |                               |                 |             |             |       |        |       | No        | 15  | 96  |
|                      | Wine                          | 0.025           | -1.235      | 0.291       | 0.110 | 0.694  | 0.332 | Yes       | 5   | 82  |
|                      |                               |                 |             |             |       |        |       | No        | 13  | 62  |
| 24h Recall           | Capsicum powder               | 0.995           | 15.269      | 4277088.650 | 0.000 | NA     | Inf   | Yes       | 18  | 147 |
|                      |                               |                 |             |             |       |        |       | No        | 0   | 2   |
|                      | Pepper (black and white)      | 0.005           | 2.688       | 14.700      | 3.102 | 81.049 | 6.480 | Yes       | 3   | 2   |
|                      |                               |                 |             |             |       |        |       | No        | 15  | 147 |
|                      | Curcumin                      | 0.995           | -16.206     | 0.000       | NA    | INF    | 0.000 | Yes       | 0   | 5   |
|                      |                               |                 |             |             |       |        |       | No        | 18  | 144 |
|                      | Ginger                        | 0.992           | -15.690     | 0.000       | NA    | INF    | 0.000 | Yes       | 0   | 8   |
|                      |                               |                 |             |             |       |        |       | No        | 18  | 142 |
|                      | Dried milled maize (chuchoca) | 0.997           | -15.582     | 0.000       | NA    | Inf    | 0.000 | Yes       | 0   | 1   |
|                      |                               |                 |             |             |       |        |       | No        | 18  | 146 |
|                      | Cooked maize (mote de maíz)   | 0.995           | -15.262     | 0.000       | NA    | INF    | 0.000 | Yes       | 0   | 2   |
|                      |                               |                 |             |             |       |        |       | No        | 18  | 148 |
|                      | Fresh maize                   | 0.783           | -0.297      | 0.743       | 0.073 | 3.293  | 0.765 | Yes       | 1   | 11  |
|                      |                               |                 |             |             |       |        |       | No        | 17  | 139 |
|                      | Peanuts                       | 0.883           | 0.118       | 1.125       | 0.241 | 3.664  | 1.110 | Yes       | 2   | 15  |
|                      |                               |                 |             |             |       |        |       | No        | 16  | 135 |
|                      | Walnuts                       | 0.852           | -0.201      | 0.818       | 0.080 | 3.663  | 0.834 | Yes       | 1   | 10  |

|  |                                      |       |         |       |       |       |       |     |    |     |
|--|--------------------------------------|-------|---------|-------|-------|-------|-------|-----|----|-----|
|  |                                      |       |         |       |       |       |       | No  | 17 | 139 |
|  |                                      |       |         |       |       |       |       | Yes | 0  | 5   |
|  | Other nuts                           | 0.995 | -16.199 | 0.000 | NA    | INF   | 0.000 | No  | 18 | 145 |
|  |                                      |       |         |       |       |       |       | Yes | 0  | 6   |
|  | Dried fruit (raisins, peaches, figs) | 0.995 | -16.402 | 0.000 | NA    | INF   | 0.000 | No  | 18 | 142 |
|  |                                      |       |         |       |       |       |       | Yes | 7  | 69  |
|  | Dairy                                | 0.552 | -0.304  | 0.738 | 0.309 | 1.688 | 0.762 | No  | 11 | 80  |
|  |                                      |       |         |       |       |       |       | Yes | 10 | 97  |
|  | Meat                                 | 0.449 | -0.381  | 0.683 | 0.298 | 1.594 | 0.713 | No  | 8  | 53  |
|  |                                      |       |         |       |       |       |       | Yes | 0  | 5   |
|  | Salmon                               | 0.995 | -16.206 | 0.000 | NA    | INF   | 0.000 | No  | 18 | 144 |
|  |                                      |       |         |       |       |       |       | Yes | 0  | 19  |
|  | Cereal                               | 0.991 | -16.643 | 0.000 | 0.000 | INF   | 0.000 | No  | 18 | 130 |
|  |                                      |       |         |       |       |       |       | Yes | 3  | 31  |
|  | Legumes                              | 0.691 | -0.264  | 0.768 | 0.224 | 2.100 | 0.788 | No  | 15 | 119 |
|  |                                      |       |         |       |       |       |       | Yes | 3  | 9   |
|  | Wine                                 | 0.117 | 1.128   | 3.089 | 0.844 | 9.522 | 2.567 | No  | 15 | 139 |
|  |                                      |       |         |       |       |       |       | Yes | 0  | 2   |
|  | Beer                                 | 0.995 | -15.269 | 0.000 | NA    | INF   | 0.000 | No  | 18 | 147 |
|  |                                      |       |         |       |       |       |       | Yes | 3  | 47  |
|  | Coffee                               | 0.188 | -0.864  | 0.421 | 0.124 | 1.136 | 0.456 | No  | 15 | 99  |
|  |                                      |       |         |       |       |       |       | Yes | 15 | 118 |
|  | Tea                                  | 0.757 | 0.206   | 1.229 | 0.448 | 4.212 | 1.203 | No  | 3  | 29  |
|  |                                      |       |         |       |       |       |       | Yes | 2  | 22  |
|  | Rice                                 | 0.820 | 0.205   | 1.227 | 0.235 | 5.142 | 1.208 | No  | 4  | 54  |

**Table S1. b.** Association between food consumption and deoxynivalenol (DON).

|                           | Food Item                | <i>p</i> -Value | Coeffi-<br>cient | OR    | 5%    | 95%    | RR    | DON  |     |    |
|---------------------------|--------------------------|-----------------|------------------|-------|-------|--------|-------|------|-----|----|
|                           |                          |                 |                  |       |       |        |       | Food | Yes | No |
| Habitual Con-<br>sumption | Dairy                    | 0.832           | 0.103            | 1.109 | 0.479 | 2.410  | 1.029 | Yes  | 105 | 39 |
|                           |                          |                 |                  |       |       |        |       | No   | 17  | 7  |
|                           |                          |                 |                  |       |       |        |       | Yes  | 90  | 39 |
|                           | Nuts                     | 0.057           | -0.988           | 0.372 | 0.147 | 0.828  | 0.810 | No   | 31  | 5  |
|                           |                          |                 |                  |       |       |        |       | Yes  | 37  | 9  |
|                           |                          |                 |                  |       |       |        |       | No   | 81  | 35 |
|                           | Capsicum powder          | 0.607           | -0.207           | 0.813 | 0.423 | 1.604  | 0.944 | Yes  | 28  | 12 |
|                           |                          |                 |                  |       |       |        |       | No   | 89  | 31 |
|                           |                          |                 |                  |       |       |        |       | Yes  | 117 | 43 |
|                           | Legumes                  | 0.887           | -0.098           | 0.907 | 0.257 | 2.637  | 0.975 | No   | 9   | 3  |
|                           |                          |                 |                  |       |       |        |       | Yes  | 36  | 14 |
|                           |                          |                 |                  |       |       |        |       | No   | 81  | 30 |
|                           | Fresh green chili        | 0.898           | -0.049           | 0.952 | 0.513 | 1.805  | 0.987 | Yes  | 23  | 13 |
|                           |                          |                 |                  |       |       |        |       | No   | 91  | 31 |
|                           |                          |                 |                  |       |       |        |       | Yes  | 41  | 14 |
|                           | Maize                    | 0.305           | 1.075            | 2.929 | 0.482 | 17.842 | 1.491 | No   | 2   | 2  |
|                           |                          |                 |                  |       |       |        |       | Yes  | 39  | 9  |
|                           |                          |                 |                  |       |       |        |       | No   | 76  | 35 |
|                           | Beer                     | 0.102           | 0.691            | 1.996 | 1.020 | 4.133  | 1.187 | Yes  | 63  | 24 |
|                           |                          |                 |                  |       |       |        |       | No   | 56  | 19 |
|                           |                          |                 |                  |       |       |        |       | Yes  | 121 | 44 |
| 24h Recall                | Capsicum powder          | 0.478           | 1.012            | 2.750 | 0.202 | 37.359 | 1.467 | No   | 1   | 1  |
|                           |                          |                 |                  |       |       |        |       | Yes  | 4   | 1  |
|                           | Pepper (black and white) | 0.745           | 0.368            | 1.445 | 0.277 | 15.389 | 1.089 | No   | 119 | 43 |
|                           |                          |                 |                  |       |       |        |       | Yes  | 3   | 2  |
|                           | Curcumin                 | 0.489           | -0.644           | 0.525 | 0.114 | 2.806  | 0.810 | No   | 120 | 42 |
|                           | Ginger                   | 0.367           | 0.977            | 2.655 | 0.584 | 27.081 | 1.207 | Yes  | 7   | 1  |

|  |                                      |       |        |              |       |        |       |     |     |    |
|--|--------------------------------------|-------|--------|--------------|-------|--------|-------|-----|-----|----|
|  |                                      |       |        |              |       |        |       | No  | 116 | 44 |
|  | Dried milled maize (chuchoca)        | 0.997 | 16.779 | 19357234.403 | 0.000 | NA     | 1.367 | Yes | 1   | 0  |
|  |                                      |       |        |              |       |        |       | No  | 120 | 44 |
|  | Cooked maize (mote de maíz)          | 0.474 | -1.020 | 0.361        | 0.027 | 4.899  | 0.680 | Yes | 1   | 1  |
|  |                                      |       |        |              |       |        |       | No  | 122 | 44 |
|  | Fresh maize                          | 0.885 | 0.100  | 1.105        | 0.380 | 3.899  | 1.026 | Yes | 9   | 3  |
|  |                                      |       |        |              |       |        |       | No  | 114 | 42 |
|  | Peanuts                              | 0.375 | 0.587  | 1.798        | 0.660 | 6.133  | 1.141 | Yes | 14  | 3  |
|  |                                      |       |        |              |       |        |       | No  | 109 | 42 |
|  | Walnuts                              | 0.529 | 0.506  | 1.658        | 0.502 | 7.757  | 1.120 | Yes | 9   | 2  |
|  |                                      |       |        |              |       |        |       | No  | 114 | 42 |
|  | Other nuts                           | 0.730 | 0.391  | 1.479        | 0.284 | 15.744 | 1.096 | Yes | 4   | 1  |
|  |                                      |       |        |              |       |        |       | No  | 119 | 44 |
|  | Dried fruit (raisins, peaches, figs) | 0.728 | -0.308 | 0.735        | 0.181 | 3.747  | 0.912 | Yes | 4   | 2  |
|  |                                      |       |        |              |       |        |       | No  | 117 | 43 |
|  | Dairy                                | 0.015 | -0.875 | 0.417        | 0.228 | 0.749  | 0.793 | Yes | 49  | 27 |
|  |                                      |       |        |              |       |        |       | No  | 74  | 17 |
|  | Meat                                 | 0.902 | -0.045 | 0.956        | 0.521 | 1.728  | 0.988 | Yes | 78  | 29 |
|  |                                      |       |        |              |       |        |       | No  | 45  | 16 |
|  | Salmon                               | 0.489 | -0.644 | 0.525        | 0.114 | 2.806  | 0.810 | Yes | 3   | 2  |
|  |                                      |       |        |              |       |        |       | No  | 120 | 42 |
|  | Cereal                               | 0.306 | -0.524 | 0.592        | 0.259 | 1.417  | 0.850 | Yes | 12  | 7  |
|  |                                      |       |        |              |       |        |       | No  | 110 | 38 |
|  | Legumes                              | 0.632 | 0.215  | 1.240        | 0.608 | 2.688  | 1.056 | Yes | 26  | 8  |
|  |                                      |       |        |              |       |        |       | No  | 97  | 37 |
|  | Wine                                 | 0.902 | 0.085  | 1.088        | 0.374 | 3.843  | 1.022 | Yes | 9   | 3  |
|  |                                      |       |        |              |       |        |       | No  | 113 | 41 |
|  | Beer                                 | 0.995 | 16.463 | 14124549     | 0.000 | NA     | 1.364 | Yes | 2   | 0  |
|  |                                      |       |        |              |       |        |       | No  | 121 | 44 |
|  | Coffee                               | 0.053 | 0.844  | 2.326        | 1.169 | 4.961  | 1.212 | Yes | 42  | 8  |
|  |                                      |       |        |              |       |        |       | No  | 79  | 35 |
|  | Tea                                  | 0.123 | -0.807 | 0.446        | 0.175 | 1.001  | 0.838 | Yes | 94  | 39 |
|  |                                      |       |        |              |       |        |       | No  | 27  | 5  |
|  | Rice                                 | 0.394 | -0.452 | 0.636        | 0.267 | 1.551  | 0.879 | Yes | 16  | 8  |
|  |                                      |       |        |              |       |        |       | No  | 44  | 14 |

**Table S1. c.** Association between food consumption and aflatoxin B1 (AFB1) and aflatoxin M1 (AFM1).

|                      | Food Item          | p-Value | Coefficient | OR          | 5%    | 95%   | RR    | AF   |     |     |
|----------------------|--------------------|---------|-------------|-------------|-------|-------|-------|------|-----|-----|
|                      |                    |         |             |             |       |       |       | Food | Yes | No  |
| Habitual Consumption | Dairy              | 0.593   | -0.364      | 0.695       | 0.244 | 2.430 | 0.722 | Yes  | 13  | 131 |
|                      |                    |         |             |             |       |       |       | No   | 3   | 21  |
|                      | Nuts               | 0.858   | 0.121       | 1.128       | 0.402 | 3.909 | 1.116 | Yes  | 12  | 117 |
|                      |                    |         |             |             |       |       |       | No   | 3   | 33  |
|                      | Whole cereal       | 0.453   | -0.503      | 0.605       | 0.175 | 1.681 | 0.630 | Yes  | 3   | 43  |
|                      |                    |         |             |             |       |       |       | No   | 12  | 104 |
|                      | Capsicum powder    | 0.167   | 0.778       | 2.176       | 0.835 | 5.435 | 2.000 | Yes  | 6   | 34  |
|                      |                    |         |             |             |       |       |       | No   | 9   | 111 |
|                      | Legumes            | 0.992   | 16.081      | 9637399.439 | 0.000 | NA    | Inf   | Yes  | 16  | 144 |
|                      |                    |         |             |             |       |       |       | No   | 0   | 12  |
|                      | Fresh green pepper | 0.834   | -0.130      | 0.878       | 0.293 | 2.320 | 0.888 | Yes  | 4   | 46  |
|                      |                    |         |             |             |       |       |       | No   | 10  | 101 |
|                      | Fresh red pepper   | 0.234   | 0.706       | 2.025       | 0.726 | 5.265 | 1.883 | Yes  | 5   | 31  |
|                      |                    |         |             |             |       |       |       | No   | 9   | 113 |
|                      | Maize              | 0.995   | 16.061      | 9440717.809 | 0.000 | NA    | Inf   | Yes  | 6   | 49  |
|                      |                    |         |             |             |       |       |       | No   | 0   | 4   |
|                      | Beer               | 0.638   | 0.276       | 1.318       | 0.477 | 3.384 | 1.285 | Yes  | 5   | 43  |

|            |                                      |       |         |                 |       |         |       |     |    |     |
|------------|--------------------------------------|-------|---------|-----------------|-------|---------|-------|-----|----|-----|
| 24h Recall | Wine                                 | 0.257 | -0.672  | 0.511           | 0.183 | 1.333   | 0.539 | No  | 9  | 102 |
|            |                                      |       |         |                 |       |         |       | Yes | 5  | 82  |
|            |                                      |       |         |                 |       |         |       | No  | 8  | 67  |
|            | Capsicum powder                      | 0.995 | 15.255  | 4219678.0<br>25 | 0.000 | NA      | Inf   | Yes | 16 | 149 |
|            |                                      |       |         |                 |       |         |       | No  | 0  | 2   |
|            | Pepper (black and white)             | 0.995 | -16.192 | 0.000           | NA    | INF     | 0.000 | Yes | 0  | 5   |
|            |                                      |       |         |                 |       |         |       | No  | 16 | 146 |
|            | Curcumin                             | 0.995 | -16.192 | 0.000           | NA    | INF     | 0.000 | Yes | 0  | 5   |
|            |                                      |       |         |                 |       |         |       | No  | 16 | 146 |
|            | Ginger                               | 0.770 | 0.323   | 1.381           | 0.133 | 6.567   | 1.333 | Yes | 1  | 7   |
|            |                                      |       |         |                 |       |         |       | No  | 15 | 145 |
|            | Dried milled maize (chuchoca)        | 0.997 | -15.562 | 0.000           | NA    | Inf     | 0.000 | Yes | 0  | 1   |
|            |                                      |       |         |                 |       |         |       | No  | 15 | 149 |
|            | Cooked maize (mote de maíz)          | 0.109 | 2.309   | 10.067          | 0.728 | 139.341 | 5.533 | Yes | 1  | 1   |
|            |                                      |       |         |                 |       |         |       | No  | 15 | 151 |
|            | Fresh maize                          | 0.884 | -0.157  | 0.855           | 0.084 | 3.820   | 0.867 | Yes | 1  | 11  |
|            |                                      |       |         |                 |       |         |       | No  | 15 | 141 |
|            | Peanuts                              | 0.741 | 0.266   | 1.305           | 0.278 | 4.302   | 1.269 | Yes | 2  | 15  |
|            |                                      |       |         |                 |       |         |       | No  | 14 | 137 |
|            | Walnuts                              | 0.954 | -0.062  | 0.940           | 0.092 | 4.247   | 0.945 | Yes | 1  | 10  |
|            |                                      |       |         |                 |       |         |       | No  | 15 | 141 |
|            | Other nuts                           | 0.433 | 0.903   | 2.467           | 0.228 | 13.356  | 2.173 | Yes | 1  | 4   |
|            |                                      |       |         |                 |       |         |       | No  | 15 | 148 |
|            | Dried fruit (raisins, peaches, figs) | 0.559 | 0.659   | 1.933           | 0.182 | 9.850   | 1.778 | Yes | 1  | 5   |
|            |                                      |       |         |                 |       |         |       | No  | 15 | 145 |
|            | Dairy                                | 0.705 | 0.199   | 1.221           | 0.509 | 2.930   | 1.197 | Yes | 8  | 68  |
|            |                                      |       |         |                 |       |         |       | No  | 8  | 83  |
|            | Meat                                 | 0.328 | 0.588   | 1.800           | 0.706 | 5.291   | 1.710 | Yes | 12 | 95  |
|            |                                      |       |         |                 |       |         |       | No  | 4  | 57  |
|            | Salmon                               | 0.995 | -16.192 | 0.000           | NA    | INF     | 0.000 | Yes | 0  | 5   |
|            |                                      |       |         |                 |       |         |       | No  | 16 | 146 |
|            | Cereal                               | 0.336 | 0.666   | 1.947           | 0.549 | 5.662   | 1.798 | Yes | 3  | 16  |
|            |                                      |       |         |                 |       |         |       | No  | 13 | 135 |
|            | Legumes                              | 0.619 | 0.304   | 1.356           | 0.455 | 3.531   | 1.314 | Yes | 4  | 30  |
|            |                                      |       |         |                 |       |         |       | No  | 12 | 122 |
|            | Wine                                 | 0.874 | -0.171  | 0.842           | 0.083 | 3.766   | 0.856 | Yes | 1  | 11  |
|            |                                      |       |         |                 |       |         |       | No  | 15 | 139 |
|            | Beer                                 | 0.996 | -15.249 | 0.000           | NA    | INF     | 0.000 | Yes | 0  | 2   |
|            |                                      |       |         |                 |       |         |       | No  | 15 | 150 |
|            | Coffee                               | 0.082 | 0.926   | 2.524           | 1.042 | 6.121   | 2.280 | Yes | 8  | 42  |
|            |                                      |       |         |                 |       |         |       | No  | 8  | 106 |
|            | Tea                                  | 0.214 | -0.720  | 0.487           | 0.193 | 1.336   | 0.529 | Yes | 11 | 122 |
|            |                                      |       |         |                 |       |         |       | No  | 5  | 27  |
|            | Rice                                 | 0.876 | -0.113  | 0.893           | 0.242 | 2.783   | 0.906 | Yes | 3  | 21  |
|            |                                      |       |         |                 |       |         |       | No  | 8  | 50  |

**Table S2.** Calculated regressions of the levels of mycotoxins in urine found and the grams per day consumed by the 172 participants of the study. **Table S2a** Day before consumption (24h recall); **Table S2b** Habitual consumption.

**Table S2. a.** Calculated regressions of the levels of mycotoxins in urine found and the grams per day consumed by the 172 participants of the study: Day before consumption (24h recall).

| Mycotoxin            | Food Item       | p-Value | Coefficient | R2     | R2_adj |
|----------------------|-----------------|---------|-------------|--------|--------|
| Aflatoxins (B1 + M1) | powder capsicum | 0.0271  | 0.3365      | 0.1806 | 0.1478 |
|                      | pepper          | NA      | NA          | NA     | NA     |
|                      | curcumin        | NA      | NA          | NA     | NA     |
|                      | ginger          | 0.7358  | 0.0000      | 0.4561 | 0.3654 |

|                                    |                 |        |          |        |         |
|------------------------------------|-----------------|--------|----------|--------|---------|
|                                    | dried maize     | NA     | NA       | NA     | NA      |
|                                    | cooked maize    | NaN    | 0.0000   | NaN    | NaN     |
|                                    | fresh maize     | 0.4038 | 0.9167   | 0.0786 | -0.0238 |
|                                    | peanut          | 0.7305 | 0.0000   | 0.5020 | 0.4688  |
|                                    | walnut          | 0.0267 | 57.7778  | 0.4375 | 0.3750  |
|                                    | other nuts      | 0.5101 | -13.8889 | 0.1563 | -0.1250 |
|                                    | dried fruit     | 0.5122 | 2.6667   | 0.1143 | -0.1071 |
|                                    | dairy           | 0.6643 | 0.2224   | 0.0026 | -0.0109 |
|                                    | meat            | 0.0687 | 0.2797   | 0.0312 | 0.0220  |
|                                    | salmon          | NA     | NA       | NA     | NA      |
|                                    | cereal          | 0.6155 | 0.0806   | 0.0152 | -0.0428 |
|                                    | legumes         | 0.4852 | -0.3544  | 0.0153 | -0.0154 |
|                                    | wine            | 0.2228 | 1.4394   | 0.1446 | 0.0590  |
|                                    | beer            | NA     | NA       | NA     | NA      |
|                                    | coffee          | 0.5304 | 0.4468   | 0.0083 | -0.0124 |
|                                    | tea             | 0.1391 | -1.0093  | 0.0169 | 0.0093  |
|                                    | rice            | 0.8395 | 0.5682   | 0.0039 | -0.0867 |
| Deoxynivalenol<br>(DON)            | powder capsicum | 0.3198 | 0.0007   | 0.0618 | 0.0032  |
|                                    | pepper          | 0.6641 | -0.0052  | 0.1128 | -0.3308 |
|                                    | curcumin        | 0.8086 | 0.0051   | 0.0877 | -0.8246 |
|                                    | ginger          | NaN    | 0.0000   | NaN    | NaN     |
|                                    | dried maize     | NA     | NA       | NA     | NA      |
|                                    | cooked maize    | NA     | NA       | NA     | NA      |
|                                    | fresh maize     | 0.9231 | 0.0006   | 0.0014 | -0.1412 |
|                                    | peanut          | NaN    | 0.0000   | NaN    | NaN     |
|                                    | walnut          | 0.4744 | 0.0548   | 0.0755 | -0.0566 |
|                                    | other nuts      | 0.7415 | 0.0036   | 0.0668 | -0.3997 |
|                                    | dried fruit     | 0.6087 | -0.0016  | 0.1531 | -0.2703 |
|                                    | dairy           | 0.7923 | 0.0004   | 0.0015 | -0.0198 |
|                                    | meat            | 0.6569 | -0.0002  | 0.0026 | -0.0105 |
|                                    | salmon          | 0.9200 | -0.0051  | 0.0157 | -0.9686 |
|                                    | cereal          | 0.4373 | 0.0004   | 0.0614 | -0.0324 |
|                                    | legumes         | 0.4325 | -0.0005  | 0.0259 | -0.0147 |
|                                    | wine            | 0.5393 | -0.0018  | 0.0562 | -0.0787 |
|                                    | beer            | NaN    | -0.3257  | 1.0000 | NaN     |
|                                    | coffee          | 0.4742 | -0.0016  | 0.0129 | -0.0118 |
|                                    | tea             | 0.8019 | 0.0004   | 0.0007 | -0.0104 |
|                                    | rice            | 0.2064 | -0.0077  | 0.1912 | 0.0901  |
| Zearalenone Me-<br>tabolites (ZEL) | powder capsicum | 0.5878 | -0.0124  | 0.0119 | -0.0276 |
|                                    | pepper          | 0.0718 | -0.0179  | 0.7134 | 0.6179  |
|                                    | curcumin        | NA     | NA       | NA     | NA      |
|                                    | ginger          | NA     | NA       | NA     | NA      |
|                                    | dried maize     | NA     | NA       | NA     | NA      |
|                                    | cooked maize    | NA     | NA       | NA     | NA      |
|                                    | fresh maize     | 0.4038 | 0.0331   | 0.0786 | -0.0238 |
|                                    | peanut          | 0.7277 | 0.0000   | 0.5021 | 0.4689  |
|                                    | walnut          | 0.7659 | 0.0856   | 0.0104 | -0.0996 |
|                                    | other nuts      | NA     | NA       | NA     | NA      |
|                                    | dried fruit     | NA     | NA       | NA     | NA      |
|                                    | dairy           | 0.5133 | 0.0012   | 0.0058 | -0.0076 |
|                                    | meat            | 0.9646 | 0.0000   | 0.0000 | -0.0095 |
|                                    | salmon          | NA     | NA       | NA     | NA      |
|                                    | cereal          | NA     | NA       | NA     | NA      |
|                                    | legumes         | 0.5316 | -0.0073  | 0.0123 | -0.0185 |
|                                    | wine            | 0.4953 | -0.0321  | 0.0477 | -0.0475 |
|                                    | beer            | NA     | NA       | NA     | NA      |

|  |        |        |        |        |         |
|--|--------|--------|--------|--------|---------|
|  | coffee | 0.4930 | 0.0140 | 0.0098 | -0.0108 |
|  | tea    | 0.3388 | 0.0024 | 0.0071 | -0.0006 |
|  | rice   | 0.8910 | 0.0001 | 0.0018 | -0.0890 |

**Table S2. b.** Calculated regressions of the levels of mycotoxins in urine found and the grams per day consumed by the 172 participants of the study: Habitual consumption.

| Mycotoxin                     | Food Item     | p-Value | Coefficient | R2      | R2_adj   |
|-------------------------------|---------------|---------|-------------|---------|----------|
| Aflatoxins (B1 + M1)          | cereal        | 0.60804 | -2.28231    | 0.00165 | -0.00459 |
|                               | nuts          | 0.90093 | 0.40119     | 0.00010 | -0.00604 |
|                               | capsicum      | 0.31978 | 0.64908     | 0.00627 | -0.00002 |
|                               | dairy (skim)  | 0.85144 | 4.90821     | 0.00021 | -0.00585 |
|                               | dairy (whole) | 0.62426 | -11.34668   | 0.00150 | -0.00474 |
|                               | dairy (all)   | 0.74895 | -9.83268    | 0.00062 | -0.00540 |
|                               | legumes       | 0.77473 | 2.92904     | 0.00048 | -0.00540 |
|                               | maize         | 0.83010 | 68.85379    | 0.00081 | -0.01671 |
|                               | beer          | 0.76774 | -3.62425    | 0.00051 | -0.00536 |
|                               | wine          | 0.44085 | -14.84479   | 0.00350 | -0.00236 |
| Deoxynivalenol (DON)          | cereal        | 0.31979 | 0.01599     | 0.00853 | -0.00001 |
|                               | nuts          | 0.00288 | 0.03242     | 0.07222 | 0.06442  |
|                               | capsicum      | 0.76400 | 0.00069     | 0.00079 | -0.00790 |
|                               | dairy (skim)  | 0.85713 | -0.01672    | 0.00027 | -0.00813 |
|                               | dairy (whole) | 0.68513 | 0.03600     | 0.00142 | -0.00719 |
|                               | dairy (all)   | 0.93966 | 0.00836     | 0.00005 | -0.00828 |
|                               | legumes       | 0.48850 | -0.02595    | 0.00388 | -0.00416 |
|                               | maize         | 0.58986 | -0.12253    | 0.00715 | -0.01707 |
|                               | beer          | 0.73809 | -0.00666    | 0.00090 | -0.00715 |
|                               | wine          | 0.80206 | -0.01743    | 0.00051 | -0.00755 |
| Zearalenone Metabolites (ZEL) | cereal        | 0.01355 | 0.07109     | 0.03750 | 0.03148  |
|                               | nuts          | 0.62579 | -0.01026    | 0.00146 | -0.00466 |
|                               | capsicum      | 0.53782 | -0.00268    | 0.00241 | -0.00391 |
|                               | dairy (skim)  | 0.28205 | -0.19515    | 0.00701 | 0.00099  |
|                               | dairy (whole) | 0.51654 | 0.09988     | 0.00263 | -0.00360 |
|                               | dairy (all)   | 0.68328 | -0.08692    | 0.00101 | -0.00501 |
|                               | legumes       | 0.88469 | -0.01028    | 0.00012 | -0.00576 |
|                               | maize         | 0.42536 | -2.38516    | 0.01118 | -0.00616 |
|                               | beer          | 0.68585 | -0.03439    | 0.00096 | -0.00491 |
|                               | wine          | 0.60678 | -0.06871    | 0.00156 | -0.00431 |

**Table S3.** Levels in ng/kg bw creatinine adjusted, probable daily intake (PDI) and risk estimation by the Hazard Quotient (HQ) or Margin of Exposure (MoE) of the mycotoxins found in urine of the participants of the study. **Table S3a** shows zearalenone metabolites ( $\alpha$  and  $\beta$  zearalenol, ZEL); **Table S3b** shows DON; and **Table S3c** shows aflatoxins.

**Table S3. a.** Levels in ng/kg bw creatinine adjusted, probable daily intake (PDI) and risk estimation by the Hazard Quotient (HQ) or Margin of Exposure (MoE) of zearalenone metabolites ( $\alpha$  and  $\beta$  zearalenol, ZEL).

| ID  | ZEL ng/mg creat | PDI<br>ng/kg bw/day | HQ    |
|-----|-----------------|---------------------|-------|
| 78  | 3.7             | 829.2               | 3.3   |
| 241 | 4.0             | 537.4               | 2.1   |
| 2   | 33.6            | 6340.9              | 25.4  |
| 82  | 13.4            | 2472.4              | 9.9   |
| 226 | 12.0            | 2648.5              | 10.6  |
| 72  | 5.1             | 1037.7              | 4.2   |
| 229 | 8.5             | 1574.7              | 6.3   |
| 212 | 158.7           | 39810.0             | 159.2 |
| 170 | 95.8            | 19164.8             | 76.7  |
| 208 | 38.9            | 8207.1              | 32.8  |

|     |      |        |      |
|-----|------|--------|------|
| 211 | 1.9  | 381.4  | 1.5  |
| 224 | 33.2 | 8111.7 | 32.4 |
| 223 | 16.2 | 3053.4 | 12.2 |
| 274 | 17.7 | 2324.4 | 9.3  |
| 235 | 6.2  | 1452.5 | 5.8  |
| 240 | 8.8  | 2984.4 | 11.9 |
| 7   | 28.6 | 5237.5 | 21.0 |
| 68  | 8.4  | 1769.6 | 7.1  |

**Table S3. b.** Levels in ng/kg bw creatinine adjusted, probable daily intake (PDI) and risk estimation by the Hazard Quotient (HQ) or Margin of Exposure (MoE) of Deoxynivalenol (DON).

| ID  | DON ng/mg creat | PDI ng/kg bw/day | HQ   |
|-----|-----------------|------------------|------|
| 256 | 243.4           | 3448.8           | 3.4  |
| 88  | 43.6            | 1787.3           | 1.8  |
| 251 | 11.1            | 491.8            | 0.5  |
| 40  | 54.1            | 784.9            | 0.8  |
| 131 | 70.8            | 936.9            | 0.9  |
| 12  | 87.1            | 846.9            | 0.8  |
| 78  | 31.4            | 613.0            | 0.6  |
| 10  | 43.8            | 399.9            | 0.4  |
| 137 | 14.3            | 721.5            | 0.7  |
| 93  | 87.4            | 2179.0           | 2.2  |
| 257 | 65.0            | 1945.8           | 1.9  |
| 154 | 25.0            | 1104.2           | 1.1  |
| 278 | 31.1            | 2563.0           | 2.6  |
| 2   | 68.0            | 1307.4           | 1.3  |
| 82  | 19.7            | 748.2            | 0.7  |
| 270 | 27.1            | 1713.0           | 1.7  |
| 192 | 35.9            | 1345.1           | 1.3  |
| 15  | 10.2            | 474.0            | 0.5  |
| 83  | 28.2            | 1598.1           | 1.6  |
| 73  | 19.3            | 528.0            | 0.5  |
| 92  | 57.8            | 1484.0           | 1.5  |
| 210 | 19.5            | 464.1            | 0.5  |
| 180 | 31.4            | 791.1            | 0.8  |
| 261 | 85.1            | 1981.5           | 2.0  |
| 44  | 57.9            | 1987.4           | 2.0  |
| 220 | 60.8            | 1800.7           | 1.8  |
| 114 | 7.2             | 195.6            | 0.2  |
| 193 | 68.3            | 1366.2           | 1.4  |
| 38  | 91.8            | 2838.4           | 2.8  |
| 268 | 30.6            | 910.2            | 0.9  |
| 196 | 443.0           | 17852.4          | 17.9 |
| 226 | 124.7           | 3594.0           | 3.6  |
| 95  | 33.3            | 1514.3           | 1.5  |
| 263 | 73.6            | 1657.1           | 1.7  |
| 141 | 20.2            | 596.5            | 0.6  |
| 191 | 15.8            | 366.3            | 0.4  |
| 183 | 41.9            | 977.1            | 1.0  |
| 237 | 106.5           | 2881.5           | 2.9  |
| 49  | 23.7            | 698.0            | 0.7  |
| 273 | 331.1           | 9235.5           | 9.2  |
| 269 | 41.7            | 1056.3           | 1.1  |
| 229 | 17.8            | 431.9            | 0.4  |
| 260 | 101.3           | 2769.7           | 2.8  |
| 187 | 36.5            | 1172.6           | 1.2  |

|     |       |        |     |
|-----|-------|--------|-----|
| 266 | 7.7   | 213.6  | 0.2 |
| 222 | 22.4  | 628.2  | 0.6 |
| 258 | 118.9 | 2923.5 | 2.9 |
| 182 | 38.9  | 913.6  | 0.9 |
| 238 | 44.2  | 1305.2 | 1.3 |
| 213 | 42.1  | 1678.5 | 1.7 |
| 265 | 40.5  | 1194.0 | 1.2 |
| 208 | 71.0  | 1955.7 | 2.0 |
| 155 | 80.9  | 2468.2 | 2.5 |
| 211 | 89.0  | 2376.2 | 2.4 |
| 224 | 74.5  | 2379.3 | 2.4 |
| 231 | 38.3  | 1465.8 | 1.5 |
| 249 | 27.1  | 806.7  | 0.8 |
| 20  | 23.9  | 1004.2 | 1.0 |
| 262 | 158.1 | 4006.2 | 4.0 |
| 275 | 81.2  | 2686.2 | 2.7 |
| 176 | 19.9  | 475.1  | 0.5 |
| 276 | 65.2  | 1846.8 | 1.8 |
| 79  | 35.1  | 834.2  | 0.8 |
| 264 | 73.0  | 2215.3 | 2.2 |
| 130 | 22.8  | 536.2  | 0.5 |
| 277 | 111.9 | 2746.6 | 2.7 |
| 147 | 33.5  | 823.4  | 0.8 |
| 24  | 27.8  | 734.6  | 0.7 |
| 134 | 63.5  | 1753.3 | 1.8 |
| 149 | 27.3  | 731.1  | 0.7 |
| 272 | 31.2  | 1049.6 | 1.0 |
| 207 | 16.7  | 327.6  | 0.3 |
| 179 | 10.4  | 344.0  | 0.3 |
| 171 | 9.9   | 268.9  | 0.3 |
| 274 | 13.4  | 403.1  | 0.4 |
| 152 | 15.9  | 440.2  | 0.4 |
| 235 | 145.8 | 4428.6 | 4.4 |
| 138 | 79.4  | 2756.7 | 2.8 |
| 175 | 90.6  | 2669.4 | 2.7 |
| 144 | 32.7  | 744.4  | 0.7 |
| 94  | 20.1  | 436.6  | 0.4 |
| 174 | 23.9  | 634.5  | 0.6 |
| 29  | 61.4  | 1179.1 | 1.2 |
| 76  | 14.4  | 382.6  | 0.4 |
| 228 | 54.8  | 1756.1 | 1.8 |
| 236 | 54.5  | 2222.4 | 2.2 |
| 132 | 48.3  | 1512.1 | 1.5 |
| 189 | 65.6  | 2157.9 | 2.2 |
| 215 | 43.0  | 1738.2 | 1.7 |
| 123 | 18.4  | 508.0  | 0.5 |
| 216 | 77.1  | 2148.4 | 2.1 |
| 136 | 53.9  | 1415.6 | 1.4 |
| 225 | 15.3  | 465.9  | 0.5 |
| 230 | 18.6  | 477.6  | 0.5 |
| 128 | 14.8  | 433.0  | 0.4 |
| 156 | 67.1  | 2247.0 | 2.2 |
| 218 | 23.2  | 752.1  | 0.8 |
| 84  | 80.0  | 2374.7 | 2.4 |
| 37  | 66.4  | 1449.0 | 1.4 |
| 142 | 216.7 | 4988.6 | 5.0 |



|     |       |         |      |
|-----|-------|---------|------|
| 151 | 14.7  | 213.6   | 0.2  |
| 143 | 32.1  | 816.3   | 0.8  |
| 233 | 829.2 | 26495.9 | 26.5 |
| 153 | 26.7  | 796.9   | 0.8  |
| 177 | 70.3  | 1783.7  | 1.8  |
| 181 | 49.0  | 903.8   | 0.9  |
| 200 | 40.6  | 1280.3  | 1.3  |
| 7   | 115.1 | 2749.9  | 2.7  |
| 184 | 29.6  | 614.1   | 0.6  |
| 68  | 25.1  | 687.4   | 0.7  |
| 25  | 21.6  | 1020.7  | 1.0  |
| 173 | 24.3  | 632.3   | 0.6  |
| 234 | 667.3 | 17709.7 | 17.7 |
| 119 | 49.6  | 1496.1  | 1.5  |
| 33  | 41.0  | 932.1   | 0.9  |
| 17  | 60.1  | 1880.7  | 1.9  |
| 117 | 11.8  | 297.0   | 0.3  |
| 51  | 93.0  | 2491.2  | 2.5  |

**Table S3. c.** Levels in ng/kg bw creatinine adjusted, probable daily intake (PDI) and risk estimation by the Hazard Quotient (HQ) or Margin of Exposure (MoE) of Aflatoxin B1 (AFB1) and aflatoxin M1 (AFM1).

| ID  | Aflatoxins ng/mg creat | PDI ng/kg bw/day | MoE    |
|-----|------------------------|------------------|--------|
| 37  | 0.09                   | 0.1              | 4202.0 |
| 38  | 0.28                   | 0.4              | 943.6  |
| 78  | 0.90                   | 1.3              | 314.3  |
| 87  | 2.56                   | 2.3              | 174.2  |
| 93  | 0.27                   | 0.3              | 1335.9 |
| 116 | 0.67                   | 0.7              | 547.1  |
| 125 | 0.13                   | 0.2              | 2373.1 |
| 137 | 0.09                   | 0.1              | 3550.4 |
| 143 | 0.17                   | 0.2              | 1905.5 |
| 147 | 0.15                   | 0.2              | 2275.5 |
| 178 | 0.48                   | 0.6              | 648.5  |
| 207 | 0.24                   | 0.2              | 1767.9 |
| 218 | 0.26                   | 0.4              | 987.9  |
| 220 | 6.58                   | 9.4              | 42.7   |
| 234 | 0.30                   | 0.4              | 1046.7 |
| 245 | 0.25                   | 0.3              | 1349.6 |

**Table S4.** LC-MS/MS parameters, equations, and recovery for the detection of targeted mycotoxins. **Table S4a.** Parameters of detection; **Table S4b.** Concentration range and equations of the method; **Table S4c.** Recovery of the method in 4 points.

**Table S4. a.** Parameters of detection of targeted mycotoxins.

| Mycotoxin  | Chemical Formula | Molecular Weight (g/mol) | Retention Time (min) | Polarity ESI | E. Interface (kv) | Collision Energy (V) | Precursor Ion (m/z) | Quantitative Ion (m/z) |
|------------|------------------|--------------------------|----------------------|--------------|-------------------|----------------------|---------------------|------------------------|
| DOM-1      | C15H20O5         | 280.3                    | 7.4                  | (+)          | 4.5               | -15                  | 281                 | 215                    |
| OTA        | C20H18O6NCl      | 403.8                    | 12.1                 | (+)          | 4.5               | -30                  | 404                 | 239                    |
| 13C20-OTA  | -                | 423.8                    | 12.1                 | (+)          | 3.5               | -20                  | 424                 | 250                    |
| AFB1       | C17H12O6         | 312.2                    | 10.4                 | (+)          | 3.5               | -20                  | 313                 | 285                    |
| 13C17-AFB1 |                  | 329.1                    | 10.4                 | (+)          | 3.5               | -20                  | 330                 | 300                    |
| AFM1       | C17H12O7         | 328.2                    | 9.1                  | (+)          | 3.5               | -30                  | 329                 | 229                    |
| 13C17-AFM1 | -                | 345.3                    | 9.1                  | (+)          | 2.0               | -30                  | 346                 | 273                    |
| 13C15-DON  | -                | 311.0                    | 6.1                  | (+)          | 3.5               | -12                  | 312                 | 263                    |
| DON        | C15H20O6         | 296.3                    | 6.1                  | (+)          | 3.5               | -12                  | 297                 | 249                    |
| ZEN        | C18H22O5         | 318.3                    | 12.1                 | (-)          | -3.5              | 20                   | 317                 | 175                    |

|               |            |       |      |     |      |    |     |     |
|---------------|------------|-------|------|-----|------|----|-----|-----|
| 13C18-ZEN     | -          | 336.0 | 12.1 | (-) | -3.5 | 20 | 335 | 290 |
| $\alpha$ -ZEL | C18H26O5   | 322.4 | 11.3 | (-) | -4.5 | 20 | 319 | 275 |
| $\beta$ -ZEL  | C18H26O5   | 322.4 | 10.8 | (-) | -4.5 | 20 | 319 | 275 |
| $\alpha$ OTA  | C11H10O5Cl | 256.6 | 12.2 | (-) | -3.5 | 20 | 255 | 167 |

**Table S4. b.** Concentration range and equations of the method of targeted mycotoxins.

| Analyte       | Concentration Range ( $\eta$ g/mL) | Equation of the line   | R <sup>2</sup> |
|---------------|------------------------------------|------------------------|----------------|
| DON           | 20.1–250.0                         | $y = 0.0102x + 0.1555$ | 0.984          |
| DOM-1         | 4.2–33.3                           | $y = 0.0989x - 0.1142$ | 0.997          |
| AFM1          | 1.1–5.0                            | $y = 0.1556x + 0.4999$ | 0.959          |
| AFB1          | 0.1–1.3                            | $y = 3.4400x - 0.1046$ | 0.991          |
| $\beta$ -ZEL  | 2.3–33.3                           | $y = 0.2749x - 0.3758$ | 0.993          |
| $\alpha$ -ZEL | 3.7–33.3                           | $y = 0.2782x + 0.0502$ | 0.993          |
| ZEN           | 1.7–13.3                           | $y = 0.4939x + 0.1806$ | 0.994          |
| OTA           | 2.1–20.0                           | $y = 1.8455x - 1.5514$ | 0.998          |
| $\alpha$ -OTA | 0.8–4.2                            | $y = 2.5915x + 0.3402$ | 0.995          |

**Table S4. c.** Recovery of the method in 4 points of targeted mycotoxins.

| Analyte       | Recovery (%) | SD   | Relative SD |
|---------------|--------------|------|-------------|
| DON           | 90.0         | 8.5  | 9.5         |
| DOM-1         | 80.9         | 10.0 | 12.4        |
| AFM1          | 82.8         | 8.8  | 10.7        |
| AFB1          | 86.3         | 7.6  | 8.8         |
| $\beta$ -ZEL  | 76.4         | 2.5  | 3.3         |
| $\alpha$ -ZEL | 84.7         | 1.2  | 1.4         |
| ZEN           | 90.7         | 3.0  | 3.3         |
| OTA           | 94.2         | 2.7  | 2.9         |
| $\alpha$ -OTA | 64.4         | 2.5  | 3.8         |

SD: Standard Deviation
